# Supplementary material for: Improving mammalian genome scaffolding using large insert mate-pair next-generation sequencing
Source: PubMed Central journal article supplement (PMC3648348; doi:10.1186/1471-2164-14-257), 2013-04-16
Supplement: 1471-2164-14-257-S3.pdf [file 1471-2164-14-257-S3.pdf]

### Additional File 3

| Library name | DNA quantity before circularization ( $\mu\text{g}$ ) | DNA quantity after circularization ( $\mu\text{g}$ ) | Circularization efficiency (%) |
|--------------|-------------------------------------------------------|------------------------------------------------------|--------------------------------|
| PE           | 3                                                     | no circularization                                   | no circularization             |
| 3 kb         | 15.7                                                  | 1.05                                                 | 6.69                           |
| 5 kb_a       | 1                                                     | 0.37                                                 | 37                             |
| 5 kb_b       | 3                                                     | 0.82                                                 | 27.20                          |
| 8 kb_a       | 2.05                                                  | 0.56                                                 | 27.07                          |
| 8 kb_b       | 6                                                     | 1.04                                                 | 17.37                          |
| 15 kb_a      | 10                                                    | 0.5                                                  | 5                              |
| 15 kb_b      | 17                                                    | 1                                                    | 5.88                           |
| 20 kb        | 17.5                                                  | 1.64                                                 | 9.35                           |
| 25 kb        | 26.6                                                  | 1.83                                                 | 6.88                           |

**Additional File 3) Table displaying the circularization efficiency of each individual library.** PE libraries have no circularization step. Smaller insert size libraries (e.g. 5 and 8 kb) have higher circularization efficiencies than the larger insert libraries (15, 20 and 25 kb).
