# Supplementary material for: Improving mammalian genome scaffolding using large insert mate-pair next-generation sequencing
Source: PubMed Central journal article supplement (PMC3648348; doi:10.1186/1471-2164-14-257), 2013-04-16
Supplement: 1471-2164-14-257-S9.pdf [file 1471-2164-14-257-S9.pdf]

## Additional file 6

### Workflow comparison SOLiD 5500 vs. SOLiD V4

|            |                           |                                     |                                                                           |                               |                                                           |                                                      |
|------------|---------------------------|-------------------------------------|---------------------------------------------------------------------------|-------------------------------|-----------------------------------------------------------|------------------------------------------------------|
| SOLiD 5500 | Shear and size-select DNA | End repair and MP adaptor ligation  | Circularization <sup>§</sup> , removal of linear DNA and nick-translation | Digestion of circularized DNA | dA-tailing, bead-binding and P1-T + P2-T adaptor ligation | Nick-translation and amplification (trial and final) |
|            | ~ 3 hr*                   | ~ 2 hr                              | ~ 2 hr                                                                    | < 2 hr                        | ~ 2 hr                                                    | < 3 hr                                               |
| SOLiD V4   | Shear and end repair      | Ligate CAP adaptors and size-select | Circularization <sup>§</sup> , removal of linear DNA and nick-translation | Digestion of circularized DNA | Bead-binding and P1 + P2 adaptor ligation                 | Shear and size-select DNA                            |
|            | ~ 2 hr                    | ~ 3 hr*                             | ~ 2 hr                                                                    | < 2 hr                        | < 2 hr                                                    | < 3 hr                                               |

\* 3 hr for 1-6 kb libraries, 30V O/N for 6-10kb libraries (0.5% agarose gel) or 19 hr for pulsed-field gel electrophoresis in case of >10kb libraries.

§ For 5500, 4x more efficient intra-molecular hybridization is used compared to circularization to an internal adaptor in the V4 protocol.

### Input comparison

|            |                                                                    |                                        |
|------------|--------------------------------------------------------------------|----------------------------------------|
| SOLiD 5500 | 1-5 µg for 700bp to 3 kb insert sizes, 10-20 µg for 10 kb inserts. | Suggested input for 20-25 kb: 20-30 µg |
| SOLiD V4   | 5-20 µg for 600bp to 6 kb insert sizes                             | Suggested input for 20-25 kb: >30 µg   |

### Additional file 6) Comparison between the MP workflow of SOLiD 5500 and SOLiD V4.

The main differences are the changed circularization procedure and the A-tailing to allow P1-T and P2-T adaptor ligation. These two improvements result in more efficient reactions, thereby requiring lower amounts of input DNA, while the complete time of the protocol stays similar (~14 hours hands on).
