# Supplementary material for: Improving mammalian genome scaffolding using large insert mate-pair next-generation sequencing
Source: PubMed Central journal article supplement (PMC3648348; doi:10.1186/1471-2164-14-257), 2013-04-16
Supplement: 1471-2164-14-257-S10.pdf [file 1471-2164-14-257-S10.pdf]

### **Additional file 7) Adapting the large insert MP protocol for Illumina sequencing.**

To apply this protocol for Illumina sequencing, an additional A-tailing step is required before adapter ligation and amplification. Where for SOLiD V4 sequencing P1 and P2 adapters are connected to the MP molecule using blunt-end ligation, Illumina (and SOLiD 5500) use A-tailing and adapters with a T-overhang. The standard A-tailing protocol for Illumina or SOLiD 5500 can be applied. The following are the adapters that need to be used for each platform (underlined = overhang).

#### SOLiD V4 adaptors:

##### **P1**

CCACTACGCCTCCGCTTTCCTCTCTATGGGCAGTCGGTGAT  
TTGGTGATGCGGAGGCGAAAGGAGAGATACCCGTCAGCCACTA

##### **P2**

AGAGAATGAGGAACCCGGGGCAGTT  
TCTCTTACTCCTTGGGCCCGTC

##### **CAP adaptor**

CTGCTGTAC  
GACGACA

##### **Internal adaptor**

CGTACATCCGCCTTGGCCGT  
TGGCATGTAGGCGGAACCGG

#### SOLiD 5500 adaptors:

##### **P1-T**

CCACTACGCCTCCGCTTTCCTCTCTATGGGCAGTCGGTGATT  
CCGGTGATGCGGAGGCGAAAGGAGAGATACCCGTCAGCCACT

##### **P2-T**

GAGAATGAGGAACCCGGGGCAGCC  
TCTCTTACTCCTTGGGCCCGTC

#### Illumina Paired-End Sequencing adaptors (# PE-102-1001)

(Oligonucleotide sequences © 2007-2012 Illumina, Inc. All rights reserved.):

##### **PE1**

ACACTCTTTCCCTACACGACGCTCTTCCGATCT  
TGTGAGAAAGGATGTGCTGCGAGAAGGCTAGp

##### **PE2**

pGATCGGAAGAGCTCGTATGCCGTCTTCTGCTTG  
TCTAGCCTTCTCGAGCATACGGCAGAAGACGAAC

#### Roche GS-FLX Sequencing:

Use adapters from: GS-FLX Titanium General Library Preparation Kit (# 05233747001 - sequence unknown). As the molecule that results from the MP protocol in this paper is short enough for 454-shotgun sequencing, standard adapters can be used (paired-end is not necessary).
